# Supplementary material
Source: PubMed Central journal article supplement (PMC5094460)
Supplement: NIHMS801131-supplement-06.pdf [file NIHMS801131-supplement-06.pdf]

**Supplementary Figure 1. Fpn peptide competes with fpn antibody to block immunohistochemical staining of mouse enterocytes.** Immunohistochemical staining of WT mouse ileum slides (**A**) without primary antibody, (**B**) with anti-ferroportin (anti-fpn) antibody 10  $\mu\text{g/ml}$  (#MTP11-A, Alpha Diagnostic International, San Antonio, TX), (**C**) with anti-fpn antibody co-incubated with fpn control peptide (MTP11-P, Alpha Diagnostic International). The scale bar represents 100 microns.

**Supplementary Figure 2. Effect of ipriflavone treatment on erythropoiesis in Th3+/- mice.** Flow cytometry was performed to analyze erythroid development in the bone marrow (**A, C**) and spleen (**B, D**) of Th3+/- mice treated with ipriflavone 0-750 mg/kg of food. The mean percentage of immature red blood cells (**A,B**), CD71+ Ter119+ (C+T+), and mature red blood cells (**C,D**), CD71-Ter119+ (C-T+), were not significantly changed with ipriflavone treatment,  $P > 0.05$  by Student's t-test for each group compared to 0 mg/kg controls. N=2-4 mice per group.

**Supplementary Figure 3. Effect of ipriflavone treatment on erythroferrone expression in Th3+/- mice.** Transcript levels for *erythroferrone* (*ERFE*) relative to *HPRT* in Th3+/- mice treated with ipriflavone 0-750 mg/kg of food. Data shown are mean fold-change over untreated mice  $\pm$  standard error. N=2-4 mice per group.

**Supplementary Figure 4. Effect of ipriflavone treatment on  $^{55}\text{Fe}$ -transferrin uptake in vitro.** Human hepatocytes, hepG2 cells, were co-treated with  $^{55}\text{Fe}$ -transferrin and 0-

100  $\mu$ M ipriflavone in 1% DMSO for 4 hours, followed by assessment of transferrin-bound cellular iron uptake. N=3 biological replicates per dose.
